# Supplementary material for: Anthraquinones of the Roots of Pentas micrantha
Source: Molecules. 2012 Dec 27;18(1):311–21. doi: 10.3390/molecules18010311 (PMC6270246; doi:10.3390/molecules18010311)

## Supporting Information

**Figuer S1.**  $^1\text{H}$ -NMR spectrum of 5,6-dihydroxylucidin-11-*O*-methyl ether (**6**),  $\text{DMSO-}d_6$ , 800 MHz.

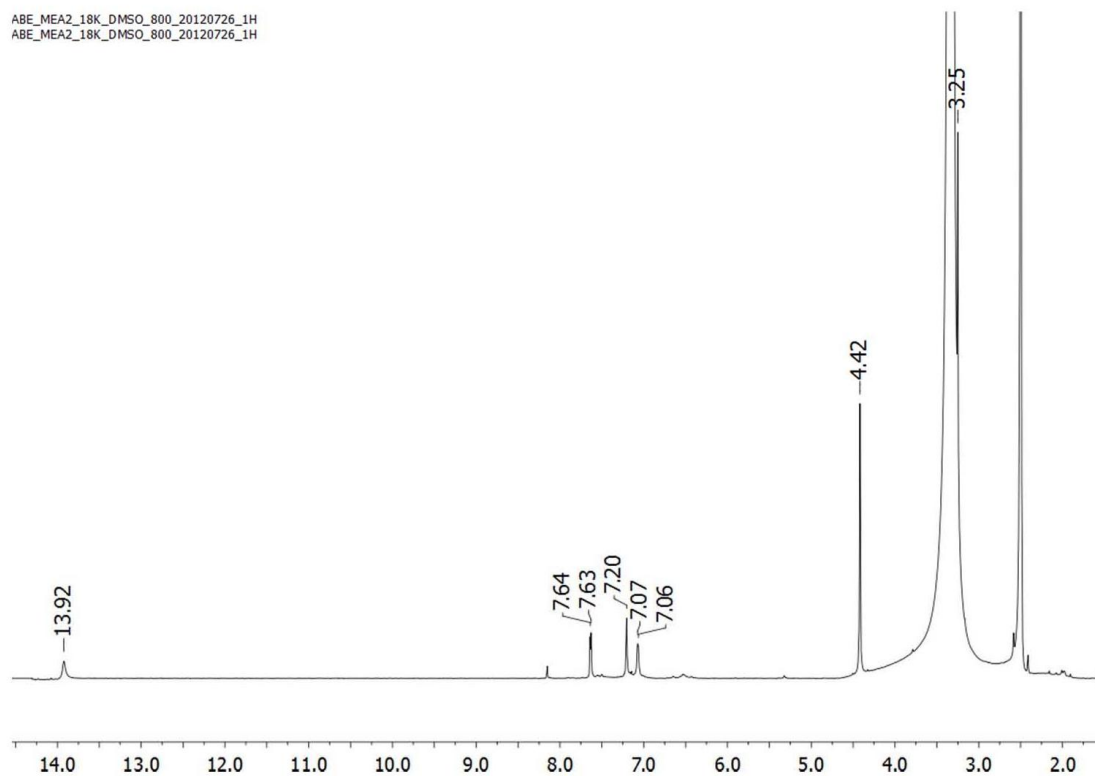

**Figuer S2.**  $^{13}\text{C}$ -NMR spectrum of 5,6-dihydroxylucidin-11-*O*-methyl ether (**6**),  $\text{DMSO-}d_6$ , 150.84 MHz.

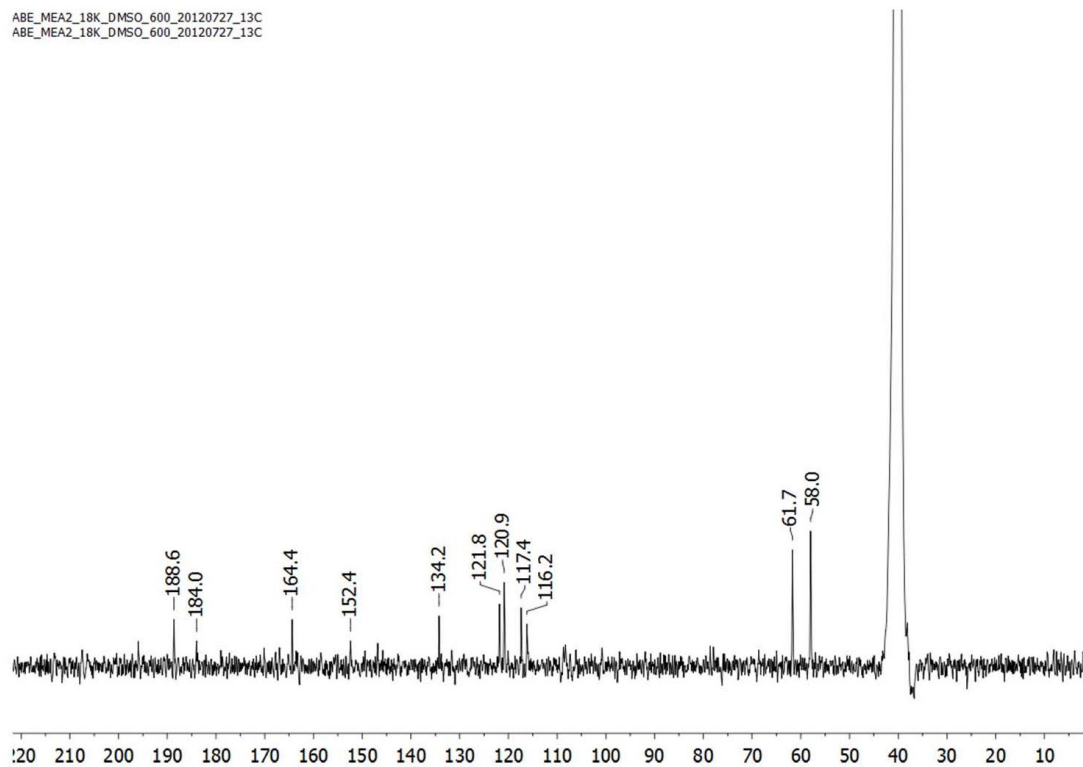

Note: The chemicals shifts of some of the quaternary carbons were derived from the  $^{13}\text{C}$ -NMR spectrum of a sample having 80% purity and were confirmed by gHMBC (Figure S5).

**Figure S3.** COSY spectrum of 5,6-dihydroxylucidin-11-*O*-methyl ether (**6**), DMSO-*d*<sub>6</sub>, 800 MHz.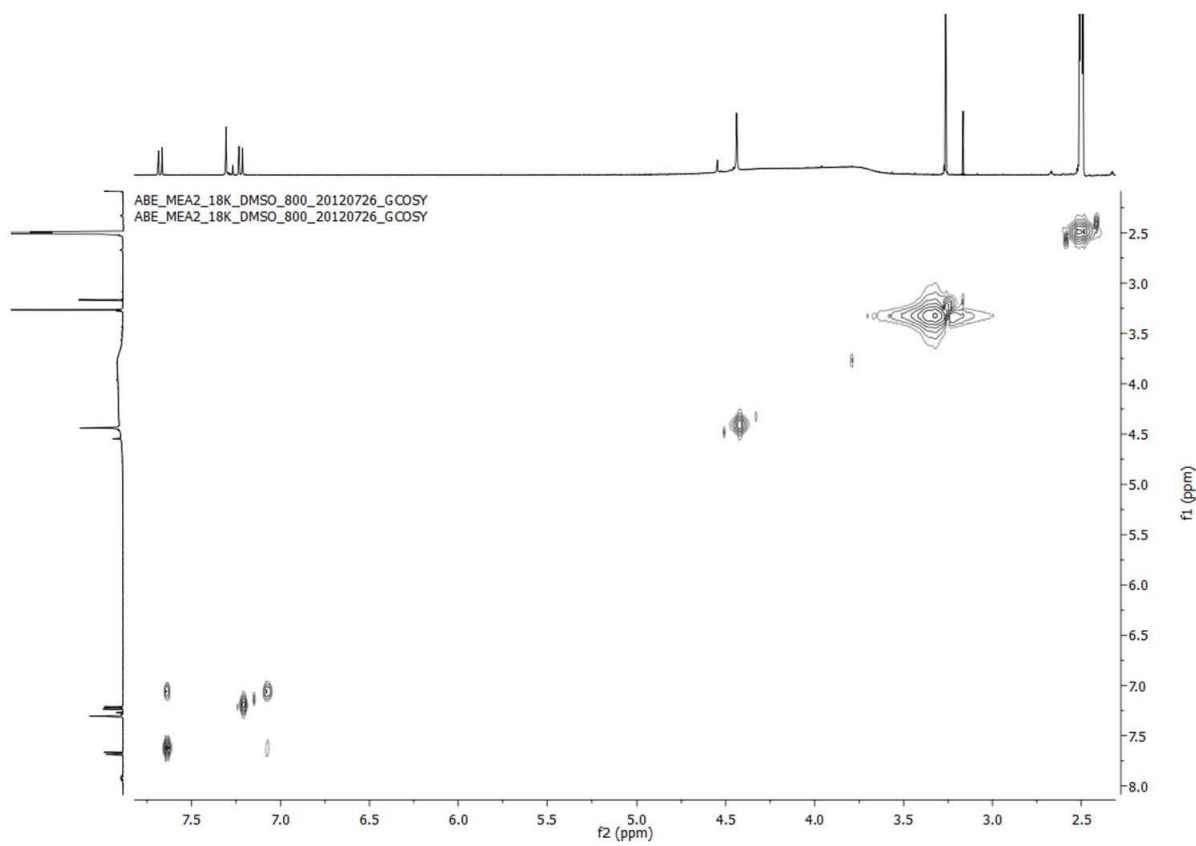**Figure S4.** gHSQC Spectrum of 5,6-dihydroxylucidin-11-*O*-methyl ether (**6**), DMSO-*d*<sub>6</sub>, 800 MHz.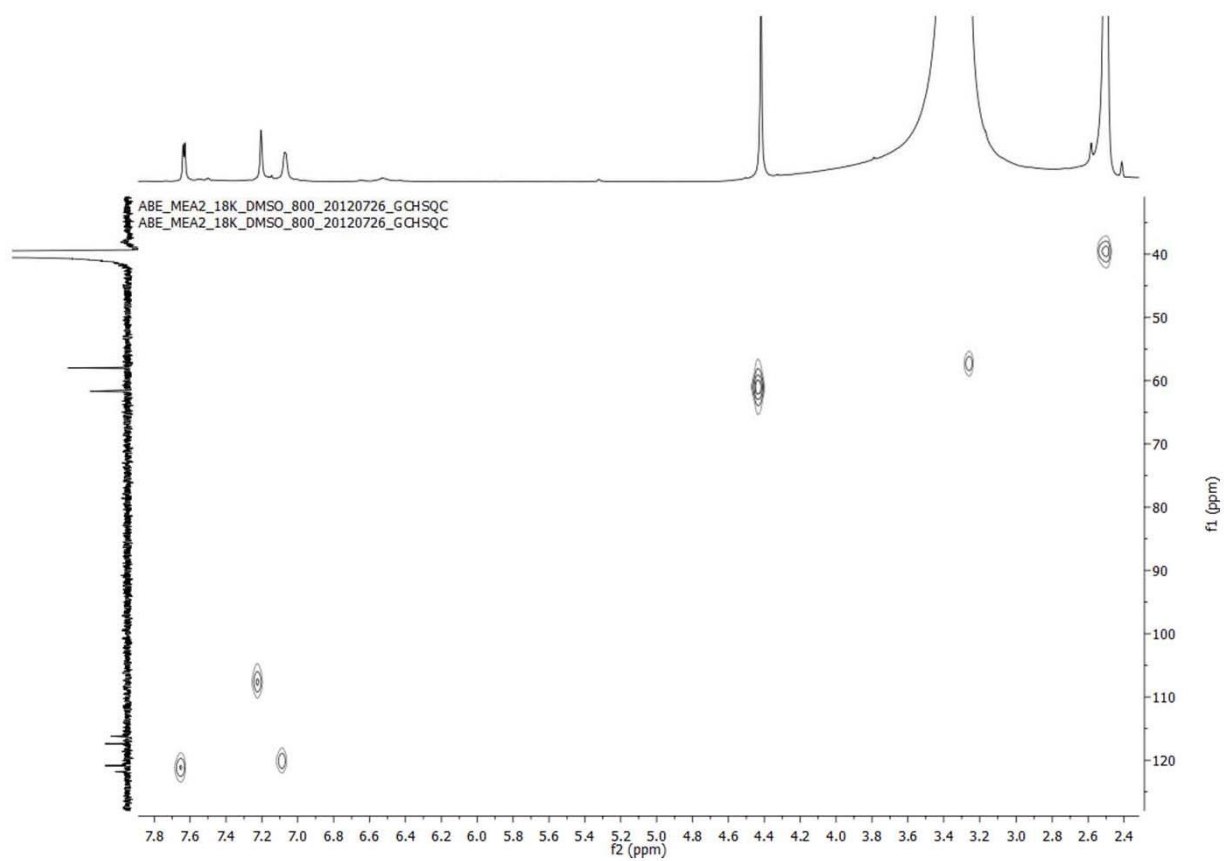

**Figure S5.** gHMBC Spectrum of 5,6-dihydroxylucidin-11-*O*-methyl ether (**6**), DMSO-*d*<sub>6</sub>, 800 MHz.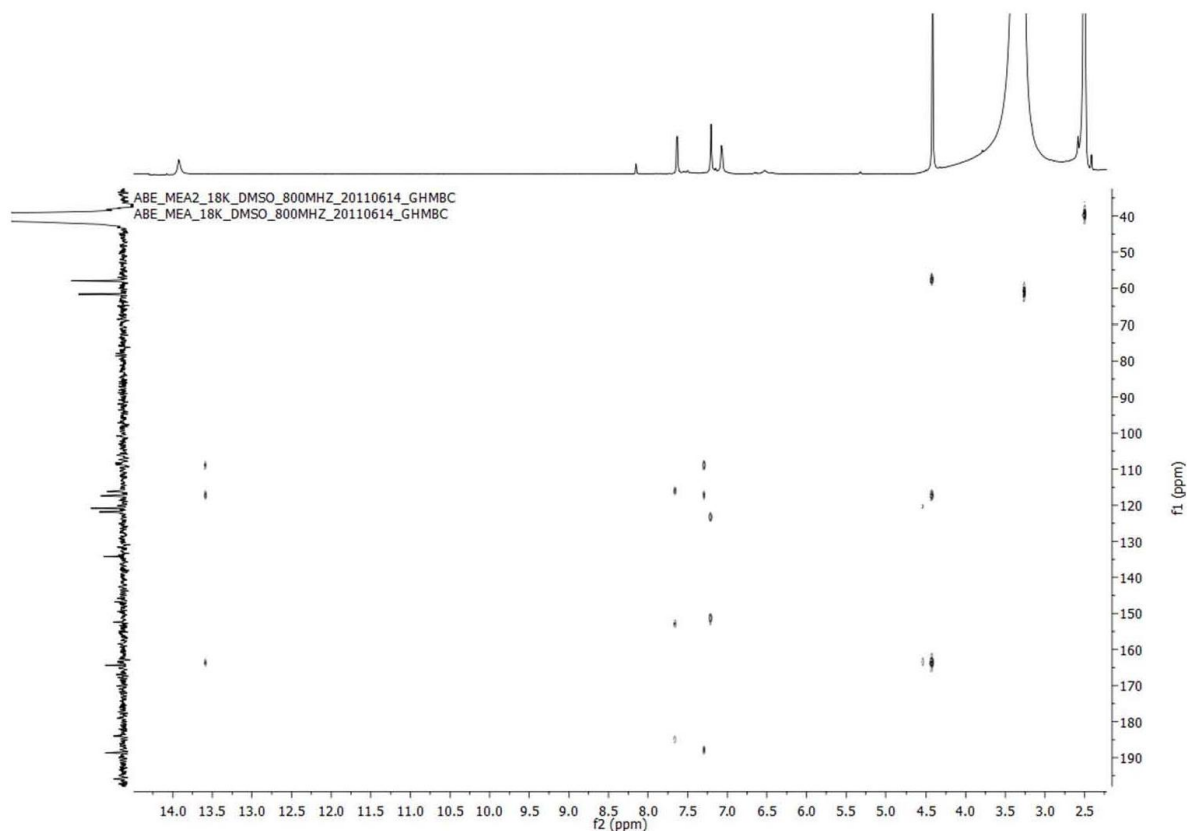**Figure S6.** HRMS (ESI) spectrum of 5,6-dihydroxylucidin-11-*O*-methyl ether (**6**). ESI(+) detection with TOF scan with 100-1500 Da detection limit and 2 scan/sec detection rate. Extern calibration was applied. The sample was dissolved in acetonitrile.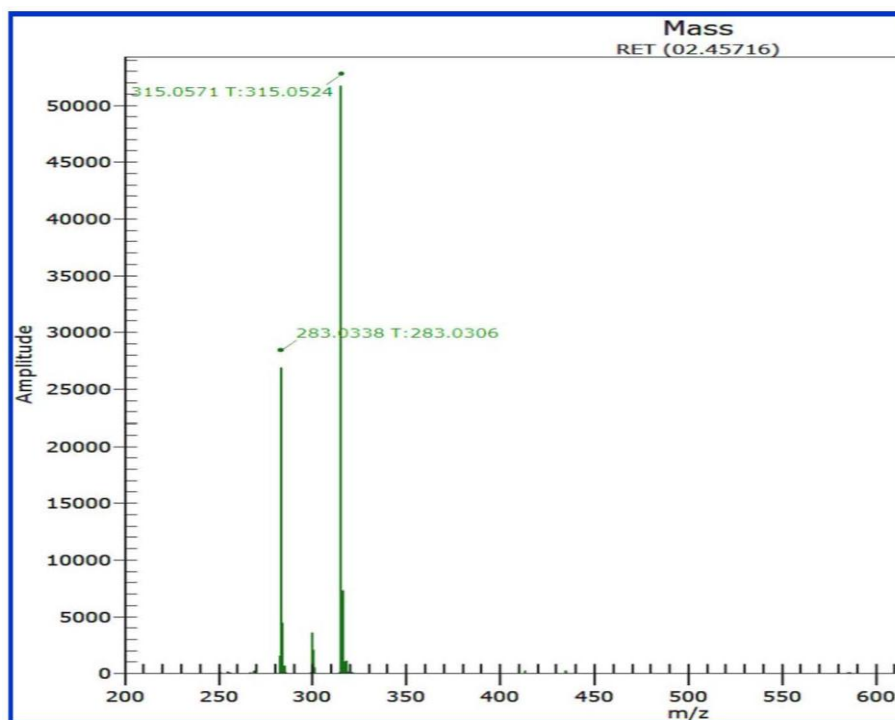

**Figure S7.** The HPLC chromatograms of the crude methanol (blue), chloroform (red) and ethyl acetate (green) root extracts. A water-acetonitrile (0.1% formic acid) gradient with 2.5 mL/min flow rate on a Gemini C-18 column (5 mm, 110 Å) was used. Isocratic CH<sub>3</sub>CN:H<sub>2</sub>O (30:70) flow for 2 min was followed by a CH<sub>3</sub>CN:H<sub>2</sub>O gradient of 30:70 to 70:30 in 5 minutes, and isocratic 70:30 for 1 min. Observation of compounds **1–9** in each extract confirms that they are not extraction artifacts resulting from methylation by methanol, for example.

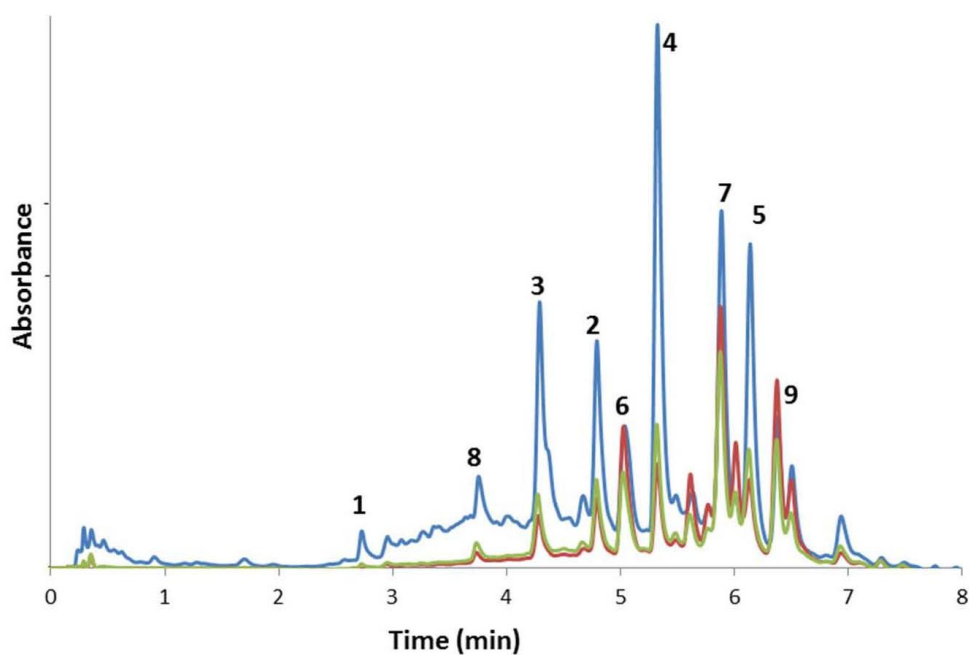

Supplement: Supplementary File 1 — Supplementary File (PDF, 494 KB) [file molecules-18-00311-s001.pdf]
